# Supplementary material for: Genetic Association of the Functional WDR4 Gene in Male Fertility
Source: MDPI journal article supplement (doi:10.3390/jpm11080760), 2021-07-30
Supplement: s1 [file s1]

*Article*

## **Genetic association of the functional WDR-4 gene in male fertility**

**Yu-Jia Wang<sup>1†</sup>, Eko Mugiyanto<sup>2†</sup>, Yun-Ting Peng<sup>1,5†</sup>, Wan-Chen Huang<sup>3</sup>, Wan-Hsuan Chou<sup>1,4</sup>, Chi-Chiu Lee<sup>3</sup>, Yu-Shiuan Wang<sup>2</sup>, Lalu Muhammad Irham<sup>1,6</sup>, Dyah Aryani Perwitasari<sup>6</sup>, Ming-I Hsu<sup>7\*</sup>, Wei-Chiao Chang<sup>1,4,5,8\*</sup>**

<sup>1</sup> Department of Clinical Pharmacy, School of Pharmacy, College of Pharmacy, Taipei Medical University, Taipei 11031, Taiwan

<sup>2</sup> PhD Program in Clinical Drug Development of Chinese Herbal Medicine, College of Pharmacy, Taipei Medical University, Taipei 11031, Taiwan

<sup>3</sup> Institute of Cellular and Organismic Biology, Academia Sinica, Taipei 115, Taiwan

<sup>4</sup> Master Program for Clinical Pharmacogenomics and Pharmacoproteomics, School of Pharmacy, Taipei Medical University, Taipei 11031, Taiwan

<sup>5</sup> Department of Pharmacy, Wan Fang Hospital, Taipei Medical University, Taipei 11696, Taiwan

<sup>6</sup> Faculty of Pharmacy, University of Ahmad Dahlan, Yogyakarta 55164, Indonesia

<sup>7</sup> Department of Obstetrics and Gynaecology, Wan Fang Hospital, Taipei Medical University, Taipei 11696, Taiwan

<sup>8</sup> Integrative Research Center for Critical Care, Wan Fang Hospital, Taipei Medical University, Taipei 11696, Taiwan

\* Correspondence: Wei-Chiao Chang; email: [wcc@tmu.edu.tw](mailto:wcc@tmu.edu.tw)

Ming I Hsu; email: [hsumingi@yahoo.com.tw](mailto:hsumingi@yahoo.com.tw)

## Supplementary Figure

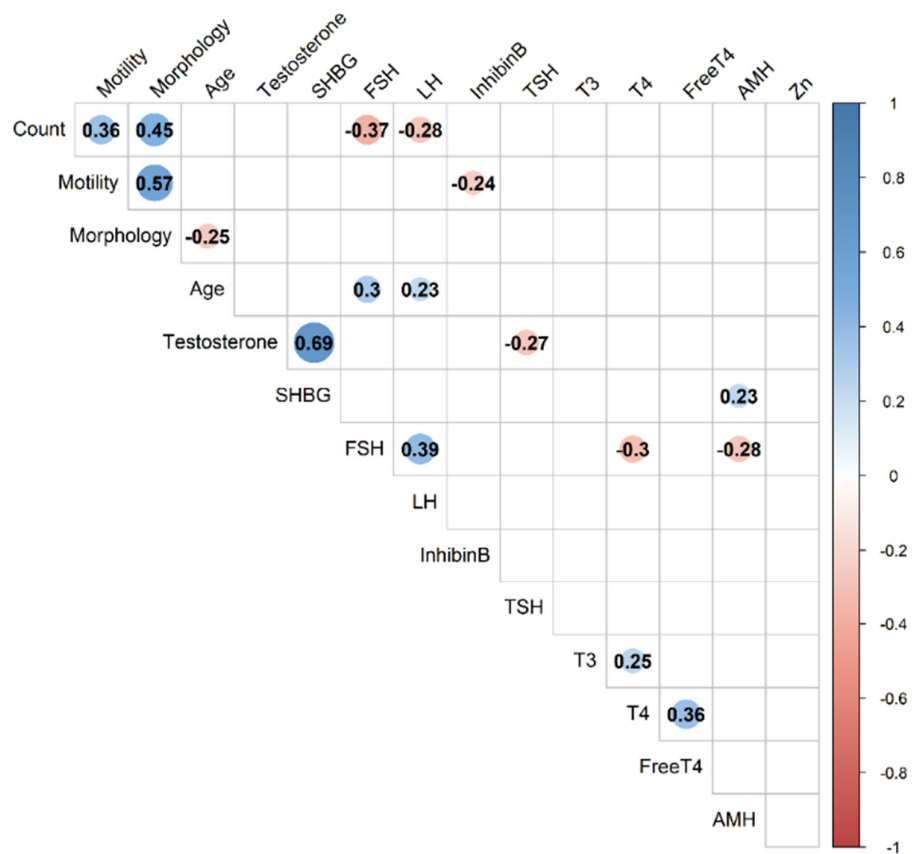

**Figure S1.** Spearman's rank correlation coefficient between age, serum hormones, and semen parameters

Supplementary Table

**Table S1.** Characteristics of tagging single-nucleotide polymorphisms (tSNPs) of the *WDR-4* gene

| Gene        | Location<br>(GRCh37.p13) | SNP       | Allele |     | Function | AFR<br>Freq | AMR<br>Freq | EUR<br>Freq | ASN<br>Freq | TWB<br>Freq | Our<br>study<br>Freq |
|-------------|--------------------------|-----------|--------|-----|----------|-------------|-------------|-------------|-------------|-------------|----------------------|
|             |                          |           | Ref    | Alt |          |             |             |             |             |             |                      |
| <i>WDR4</i> | chr21:44274642           | rs2298666 | G      | A   | Intron   | 0.03        | 0.06        | 0.05        | 0.17        | 0.15        | 0.15                 |
|             | chr21:44275979           | rs465663  | T      | C   | Intron   | 0.24        | 0.32        | 0.32        | 0.32        | 0.29        | 0.26                 |
|             | chr21:44293744           | rs2248490 | C      | G   | Missense | 0.28        | 0.37        | 0.47        | 0.34        | 0.32        | 0.33                 |
|             | chr21:44269355           | rs3746939 | A      | C   | 3'-UTR   | 0.08        | 0.11        | 0.14        | 0.27        | 0.22        | 0.25                 |

Freq, frequency of the alternate (Alt) allele. Ref, reference. AFR, African; AMR, American; ASN, Asian; EUR, European; TWB, Taiwan Biobank.

**Table S2.** *Cis*-expression quantitative trait loci (*cis*-eQTL) of rs465663

| SNP      | Gene              | <i>p</i> value       | NES   | Tissue                               | Action   |
|----------|-------------------|----------------------|-------|--------------------------------------|----------|
| rs465663 | <i>WDR4</i>       | 1.3×10 <sup>-8</sup> | 0.37  | Testis                               | TT<TC<CC |
|          | <i>WDR4</i>       | 0.000043             | 0.12  | Whole blood                          | TT<TC<CC |
|          | <i>WDR4</i>       | 0.0001               | 0.10  | Oesophagal mucosa                    | TT<TC<CC |
|          | <i>U2AF1</i>      | 0.000031             | -0.25 | Artery tibial                        | TT>TC>CC |
|          | <i>U2AF1</i>      | 0.000031             | -0.25 | Skin-not sun exposed<br>(suprapubic) | TT>TC>CC |
|          | <i>U2AF1</i>      | 0.000089             | -0.19 | Whole blood                          | TT>TC>CC |
|          | <i>U2AF1</i>      | 0.00009              | -0.23 | Skin-sun exposed<br>(lower leg)      | TT>TC>CC |
|          | <i>NDUFV3</i>     | 4.2×10 <sup>-8</sup> | -0.21 | Cells: cultured fibroblasts          | TT>CC>TC |
|          | <i>NDUFV3</i>     | 3.6×10 <sup>-6</sup> | -0.16 | Muscle-skeletal                      | TT>TC>CC |
|          | <i>NDUFV3</i>     | 0.000034             | -0.16 | Esophagus-muscularis                 | TT>TC>CC |
|          | <i>LINC01668</i>  | 4.9×10 <sup>-7</sup> | -0.29 | Nerve-tibial                         | TT>TC>CC |
|          | <i>ERVH48-1</i>   | 8.6×10 <sup>-6</sup> | 0.19  | Thyroid                              | TT<TC<CC |
|          | <i>CBS</i>        | 2.8×10 <sup>-6</sup> | 0.31  | Cells: cultured fibroblasts          | TT<TC<CC |
|          | <i>AP001628.7</i> | 8.0×10 <sup>-7</sup> | -0.29 | Nerve-tibial                         | TT>TC>CC |

SNP, single-nucleotide polymorphism; NES, normalized effect size. Data were obtained from the Genotype-Tissue Expression (GTEx) Portal on May 4, 2020.

**Table S3.** Associations between genetic variants of the *WDR4* gene and total sperm number

| SNP       | Genotype | No | Value  |       | <i>p</i> -value |           |          |
|-----------|----------|----|--------|-------|-----------------|-----------|----------|
|           |          |    | Mean   | S.E.  | Dominant        | Recessive | Additive |
| rs2298666 | GG       | 58 | 221.50 | 25.85 | 0.924           | 0.801     | 0.995    |
|           | GA       | 20 | 217.81 | 47.97 |                 |           |          |
|           | AA       | 2  | 254.00 | 76.00 |                 |           |          |
| rs465663  | TT       | 42 | 193.83 | 29.88 | 0.314           | 0.427     | 0.279    |
|           | TC       | 27 | 228.79 | 35.89 |                 |           |          |
|           | CC       | 10 | 290.92 | 74.94 |                 |           |          |
| rs2248490 | CC       | 38 | 213.36 | 34.27 | 0.734           | 0.549     | 0.974    |
|           | CG       | 33 | 242.80 | 35.85 |                 |           |          |
|           | GG       | 10 | 218.60 | 48.40 |                 |           |          |
| rs3746939 | AA       | 45 | 209.71 | 28.78 | 0.503           | 0.531     | 0.428    |
|           | AC       | 31 | 238.43 | 39.16 |                 |           |          |
|           | CC       | 5  | 295.60 | 80.12 |                 |           |          |

The *p*-value was adjusted for age, total testosterone, follicle-stimulating hormone, and luteinizing hormone. SNP, single-nucleotide polymorphism. S.E., standard error.

**Table S4.** Associations between genetic variants of the *WDR4* gene and sperm progressive motility

| SNP       | Genotype | No | Value |      | <i>p</i> -value |           |               |
|-----------|----------|----|-------|------|-----------------|-----------|---------------|
|           |          |    | Mean  | S.E. | Dominant        | Recessive | Additive      |
| rs2298666 | GG       | 58 | 37.93 | 2.27 | <b>0.014*</b>   | 0.587     | <b>0.021*</b> |
|           | GA       | 20 | 46.75 | 3.84 |                 |           |               |
|           | AA       | 2  | 51.50 | 1.50 |                 |           |               |
| rs465663  | TT       | 42 | 36.26 | 2.87 | <b>0.025*</b>   | 0.329     | <b>0.041*</b> |
|           | TC       | 27 | 44.11 | 3.36 |                 |           |               |
|           | CC       | 10 | 48.90 | 0.85 |                 |           |               |
| rs2248490 | CC       | 38 | 35.53 | 3.12 | <b>0.017*</b>   | 0.617     | 0.050         |
|           | CG       | 33 | 44.36 | 2.78 |                 |           |               |
|           | GG       | 10 | 45.20 | 2.92 |                 |           |               |
| rs3746939 | AA       | 45 | 37.76 | 2.66 | 0.119           | 0.430     | 0.113         |
|           | AC       | 31 | 43.19 | 3.13 |                 |           |               |
|           | CC       | 5  | 45.60 | 4.48 |                 |           |               |

The *p*-value was adjusted for age, total testosterone, follicle-stimulating hormone, and luteinizing hormone. \**p*<0.05. SNP, single-nucleotide polymorphism. S.E., standard error.

**Table S5.** Associations between genetic variants of the *WDR4* gene and sperm morphology

| SNP       | Genotype | No | Value |      | <i>p</i> -value |           |          |
|-----------|----------|----|-------|------|-----------------|-----------|----------|
|           |          |    | Mean  | S.E. | Dominant        | Recessive | Additive |
| rs2298666 | GG       | 58 | 10.48 | 0.61 | 0.799           | 0.251     | 0.900    |
|           | GA       | 20 | 9.55  | 0.84 |                 |           |          |
|           | AA       | 2  | 15.00 | 0    |                 |           |          |
| rs465663  | TT       | 42 | 10.31 | 0.79 | 0.855           | 0.961     | 0.915    |
|           | TC       | 27 | 9.96  | 0.73 |                 |           |          |
|           | CC       | 10 | 11.20 | 0.92 |                 |           |          |
| rs2248490 | CC       | 38 | 10.05 | 0.82 | 0.723           | 0.570     | 0.994    |
|           | CG       | 33 | 10.58 | 0.71 |                 |           |          |
|           | GG       | 10 | 10.30 | 1.16 |                 |           |          |
| rs3746939 | AA       | 45 | 10.49 | 0.73 | 0.624           | 0.436     | 0.922    |
|           | AC       | 31 | 9.77  | 0.68 |                 |           |          |
|           | CC       | 5  | 11.80 | 2.06 |                 |           |          |

The *p*-value was adjusted for age, total testosterone, follicle-stimulating hormone, and luteinizing hormone. SNP, single-nucleotide polymorphism. S.E., standard error.
